# Supplementary material for: Co-Occurrence of Wing Deformity and Impaired Mobility of Alates with Deformed Wing Virus in Solenopsis invicta Buren (Hymenoptera: Formicidae)
Source: MDPI journal article supplement (doi:10.3390/insects14100788), 2023-09-27
Supplement: s1 [file s1]

# Co-occurrence of Wing Deformity and Impaired Mobility of Alates with Deformed Wing Virus (DWV) in *Solenopsis invicta* Buren (Hymenoptera: Formicidae)

Godfrey P. Miles<sup>a</sup>, Xiaofen F. Liu<sup>a</sup>, Esmaeil Amiri<sup>b</sup>, Michael J. Grodowitz<sup>a</sup>, Margaret L. Allen<sup>a</sup>, and Jian Chen<sup>a,1</sup>

Author affiliations: <sup>a</sup>Biological Control of Pests Research Unit, USDA-ARS, Stoneville, MS 38776, USA; <sup>b</sup>Mississippi State University, Delta Research and Extension Center, 82 Stoneville Road, Stoneville, MS 38776.

## Supplementary Materials

**Table S1.** Information of *S. invicta* colonies used in this study.

**Data Set S1A-H.** Results of Sanger sequencing of *S. invicta* samples.

**Videos.** Description of eight videos depicting both DW and NW male and female alates from *S. invicta* lab and field colonies (<https://doi.org/10.5281/zenodo.8357376>).

**Figure S1.** Phylogenetic tree based on sequences from samples of *S. invicta* and positive control of *A. mellifera* with DWV against deformed wing virus sequence fragments on which the sequencing primer sets were located.

| Colony Label           | Abbreviated | Collected or In Situ  | Collection Date         | Location County | GPS              |
|------------------------|-------------|-----------------------|-------------------------|-----------------|------------------|
| RIFA-WASH-08-(4)       | 2021        | Collected             | 11/16/2021              | Washington      | 33.16 N, 90.90 W |
| RIFA-WASH-08-(4)       | 2021B       | Collected             | 11/16/2021              | Washington      | 33.16 N, 90.92 W |
| RIFA-WASH-01           | 1           | Collected             | 6/2/2022                | Washington      | 33.16 N, 90.92 W |
| RIFA-WASH-02           | 2           | Collected             | 6/2/2022                | Washington      | 33.16 N, 90.92 W |
| RIFA-WASH-03           | 3           | Collected             | 6/2/2022                | Washington      | 33.16 N, 90.92 W |
| RIFA-WASH-04           | 4           | Collected             | 6/2/2022                | Washington      | 33.16 N, 90.92 W |
| RIFA-WASH-05           | 5           | Collected             | 6/2/2022                | Washington      | 33.16 N, 90.92 W |
| RIFA-WASH-06           | 6           | Collected             | 6/2/2022                | Washington      | 33.16 N, 90.92 W |
| RIFA-WASH-07           | 7           | Collected             | 6/2/2022                | Washington      | 33.16 N, 90.92 W |
| RIFA-WASH-08           | 8           | Collected             | 6/2/2022                | Washington      | 33.16 N, 90.92 W |
| RIFA-WASH-09           | 9           | Collected             | 6/2/2022                | Washington      | 33.16 N, 90.92 W |
| RIFA-WASH-10           | 10          | Collected             | 6/2/2022                | Washington      | 33.16 N, 90.92 W |
| RIFA-WASH-11           | 11          | Collected             | 6/2/2022                | Washington      | 33.16 N, 90.92 W |
| RIFA-WASH-12           | 12          | Collected             | 6/2/2022                | Washington      | 33.16 N, 90.92 W |
| RIFA-WASH-13           | 13          | Collected             | 6/2/2022                | Washington      | 33.16 N, 90.92 W |
| RIFA-WASH-14           | 14          | Collected             | 6/2/2022                | Washington      | 33.16 N, 90.92 W |
| RIFA-WASH-15           | 15          | Collected             | 6/2/2022                | Washington      | 33.16 N, 90.92 W |
| RIFA-WASH-1B           | 1B          | Collected             | 8/30/2022               | Washington      | 33.16 N, 90.92 W |
| RIFA-WASH-2B           | 2B          | Collected             | 8/30/2022               | Washington      | 33.16 N, 90.92 W |
| RIFA-WASH-3B           | 3B          | Collected             | 8/30/2022               | Washington      | 33.16 N, 90.92 W |
| RIFA-WASH-4B           | 4B          | Collected             | 8/30/2022               | Washington      | 33.16 N, 90.92 W |
| RIFA-WASH-5B           | 5B          | Collected             | 8/30/2022               | Washington      | 33.16 N, 90.92 W |
| RIFA-WASH-1C           | 1C          | Collected             | 1/27/2023               | Washington      | 33.16 N, 90.92 W |
| RIFA-WASH-2C           | 2C          | Collected             | 1/27/2023               | Washington      | 33.16 N, 90.92 W |
| RIFA-WASH-3C           | 3C          | Collected             | 1/27/2023               | Washington      | 33.16 N, 90.92 W |
| RIFA-WASH-4C           | 4C          | Collected             | 1/27/2023               | Washington      | 33.16 N, 90.92 W |
| RIFA-WASH-5C           | 5C          | Collected             | 1/27/2023               | Washington      | 33.16 N, 90.92 W |
| RIFA-WASH-Greenville-1 | G-1         | Collected (new queen) | 7/22/2021               | Washington      | 33.35 N, 91.04 W |
| RIFA-WASH-Greenville-2 | G-2         | Collected (new queen) | 7/23/2021               | Washington      | 33.35 N, 91.04 W |
| RIFA-WASH-NBCL-1       | NBCL-1      | In Situ               | 8/31/2022-to-11/10/2022 | Washington      | 33.43 N, 90.92 W |
| RIFA-WASH-NBCL-2       | NBCL-2      | In Situ               | 8/31/2022-to-11/10/2022 | Washington      | 33.43 N, 90.92 W |
| RIFA-WASH-NBCL-3       | NBCL-3      | In Situ               | 8/31/2022-to-11/10/2022 | Washington      | 33.43 N, 90.92 W |
| RIFA-WASH-NBCL-4       | NBCL-4      | In Situ               | 8/31/2022-to-11/10/2022 | Washington      | 33.43 N, 90.92 W |
| RIFA-WASH-NBCL-5       | NBCL-5      | In Situ               | 8/31/2022-to-11/10/2022 | Washington      | 33.43 N, 90.92 W |
| RIFA-WASH-NBCL-6       | NBCL-6      | In Situ               | 8/31/2022-to-11/10/2022 | Washington      | 33.43 N, 90.92 W |
| RIFA-WASH-NBCL-7       | NBCL-7      | In Situ               | 8/31/2022-to-11/10/2022 | Washington      | 33.43 N, 90.92 W |
| RIFA-WASH-NBCL-8       | NBCL-8      | In Situ               | 8/31/2022-to-11/10/2022 | Washington      | 33.43 N, 90.92 W |
| RIFA-WASH-NBCL-9       | NBCL-9      | In Situ               | 8/31/2022-to-11/10/2022 | Washington      | 33.43 N, 90.92 W |
| RIFA-WASH-NBCL-10      | NBCL-10     | In Situ               | 8/31/2022-to-11/10/2022 | Washington      | 33.43 N, 90.92 W |
| RIFA-WASH-NBCL-11      | NBCL-11     | In Situ               | 8/31/2022-to-11/10/2022 | Washington      | 33.43 N, 90.92 W |
| RIFA-WASH-NBCL-12      | NBCL-12     | In Situ               | 8/31/2022-to-11/10/2022 | Washington      | 33.43 N, 90.92 W |
| RIFA-WASH-NBCL-13      | NBCL-13     | In Situ               | 8/31/2022-to-11/10/2022 | Washington      | 33.43 N, 90.92 W |
| RIFA-WASH-NBCL-14      | NBCL-14     | In Situ               | 8/31/2022-to-11/10/2022 | Washington      | 33.43 N, 90.92 W |

Colonies G-1 and G-2 were initiated using new queens collected on July 21, 2021, in a parking lot of Nelco Cineplex, Greenville, Mississippi. The apparatus method used to set up the new colonies was described by [34].

**Supplementary Materials: Data Set S1A.** Results of Sanger sequencing of samples of *S. invicta* ants from Figure 3., showing positive results for replicative form of DWV: adult workers from colony 8, (pooled,  $n=10$ ), worker pupae, colony 10, (pooled,  $n=5$ ), and deformed wing (DW) male alates, colony 8, (pooled,  $n=5$ ), showing positive detection for the replicative form of DWV using a tag-primer that was incorporated into a fragment of the RNA-dependent RNA polymerase (RD-RP) gene during the reverse transcriptase step. Samples were ten-times diluted. Additional sequence is from a NW male alates showing the replicative form of the DWV, which is at two-times dilution.

**Adult workers from colony 8, (pooled,  $n=10$ )** [% Identity; Top Accession]

>Workers\_DWV-B23\_DWV-10Xdilu-22Mar23\_A06\_2023-03-22\_3.ab1; from Contig 3 (237 bases) [98.00%; MH069505.1]

GAGCACATGTTTAGGTGGATGTTTTGAACCCATGTTTAAAGAAAGTAGCAGTCTGTAACGTCCGCCACTTTACAGTATTTCTGATTTATCCTGATCCGTAAATCCATCTTATATTGTGAAAAGAATTTCTATCGTCACGGCGT  
TAAACTTATCAATCATGTTATCGCTAACATTCATGATAAGATCATCGCCATAACAGACAAGAACAACATTTTGAGAGAACTCGGACAAA

**Worker pupae, colony 10, (pooled,  $n=5$ )**

>Pupae\_DWV-B23\_DWV-10Xdilu-22Mar23\_B06\_2023-03-22\_3.ab1 (439 bases) [99.17%; MH069505.1]

CGGCTACCTCTACGGCTCCACTCGGTACTCTGACTCCCGCACATGCCGCTCTAACGCCCTTCTACCGACTCCTTTCCAGGTTAGCTAGAAACACAGGTCTAGTTGGATGTTTTAAGAACCCTGTTTTAAGAAAGTAGCAGTCTGT  
AACGTCCGCCACTTTACAGTATTTCTGATTTATCCTGATCCGTAAATCCATCTTATATTGTGAAAAGAATTTCTATCGTCACGGCGTTAACTTATCAATCATGTTATCGCTAACATTCATGATAAGATCATCGCCATAACAGA  
CAAGAACAACATTTTGAGAGAACTCGGACAAAGGCAATCAGTAATACCTAACCAAGCTAACCTAATTAACAACAATTTGAAATTGATTCAATATGTCCGTATTGGAGAACCTGATGGACCACGGTGCGCAGGCTATAAGG

**Deformed wing (DW) male alates, colony 8, (pooled,  $n=5$ ) (423 bases); 99.46%; MH069505.1**

>DW-alates\_DWV-B23\_DWV-10Xdilu-22Mar23\_C06\_2023-03-22\_3.ab1; from Contig 3

CTTAAGGCAGGGGAAACGGCGCGTGAATCTCTAACGCCCAATTCGTCGTTCTTCTACCGAGACCTTGTCAGGTTAGCTAGAAACACAGGTCTAGTTGGATGTTTTAAGAACCCTGTTTTAAGAAAGTAGCAGTCTGTAAC  
GTCCGCCACTTTACAGTATTTCTGATTTATCCTGATCCGTAAATCCATCTTATATTGTGAAAAGAATTTCTATCGTCACGGCGTTAACTTATCAATCATGTTATCACTAACATTCATGATAAGATCATCGCCATAACAGACAA  
GAACAACATTTTGAGAGAACTCGGACAAAGGCAATCAGTAATACCTAACCAAGCTAACCTAATTAACAACAATTTGAAATTGATTCAATATGTCCGTATTGGAGAACCTGATAGACCACAGTGCGC

**Normal wing male (NW), colony 14, (single alate) (373 bases) (male) [98.66%; MG831204.1]**

>14-NW-M-18\_Tag\_2XD\_DWV-rep-17Feb23\_F06\_2023-02-21\_2.ab1 (two-times dilution)

ATGGTTGGGTATTACTGATTTGCCTTTGTCAGAGTTCTCTAAAATGTTGTTCTTGCTGTTATGGCGACGATCTTATCATGAATGTTAGTGATAACATGATTGATAAGTTCAACGCCGTGACGATAGGAAAATCTTTTACAATA  
TAAGATGGAATTTACGGATCAGGATAAATCAGGAAATACTGTAAAGTGGCGGACGTTACAGACTGCTACTTTCTTAAACATGGGTTCTTAAACATCCAACCTAGACCTGTGTTTCTAGCTAACCTGGACAAGGTCTCGGTAGAA  
GGAACGACGAATTGGACTCATGCTCGAGGATTGGGTCGTCGTACAGCAACCATAGAAAATGCTAAACAAGCGTTAGAGTTA

**Supplementary Materials: Data Set S1B.** Results of Sanger sequencing of multiple samples from workers, a NW female alate and a Queen of *S. invicta* showing positive detection for DWV using subvariant-A-specific primers.

## B

Ants (adult workers) from various DWV-positive colonies [% Identity; Top Accession]

>1\_DWV-A-R\_Ants-13Oct2022\_A04\_2022-10-13\_3.ab1 (123 bases) [100%; OP889268.1]

ACACGCAAATTATCAGTCCACACAAGATCAAAGTCAGCAATATGTTTCATGACGCTTACTACACCACGTAGCTATATATTTCTTCTGTTTTCCAGTTATATAACCTTCATCCACAAGACAAAGC

>2\_DWV-A-F\_Ants-13Oct2022\_B03\_2022-10-13\_3.ab1 (131 bases) [98.36%; MF409157.1]

ATTCTACGCTACGTGGTGTAGTAAGCGTCATGAACATATTGCTGACTTTGATCTTGTGTGGACTGATAATTTGCGTGTGTTAAGCGCGTATGCGCATGAACGTTTCATCTTCAACTCGGCTTTCTACGGAA

>2\_DWV-A-R\_Ants-13Oct2022\_B04\_2022-10-13\_3.ab1 (109 bases) [100%; OP889268.1]

TATCAGTCCACACAAGATCAAAGTCAGCAATATGTTTCATGACGCTTACTACACCACGTAGCTATATATTTCTTCTGTTTTCCAGTTATATAACCTTCATCCACAAGACA

>3\_DWV-A-F\_Ants-13Oct2022\_C03\_2022-10-13\_3.ab1 (128 bases) [98.43%; MF409157.1]

ATATAGCTACGTGGTGTAGTAAGCGTCATGAACATATTGCTGACTTTGATCTTGTGTGGACTGATAATTTGCGTGTGTTAAGCGCGTATGCGCATGAACGTTTCATCTTCAACTCGGCTTTCTACGGAA

>3\_DWV-A-R\_Ants-13Oct2022\_C04\_2022-10-13\_3.ab1 (134 bases) [98.48%; MG831202.1]

GCATACGCGCTTACACACGCAAATTATCAGTCCACACAAGATCAAAGTCAGCAATATGTTTCATGACGCTTACTACACCACGTAGCTATATATTTCTTCTGTTTTCCAGTTATATAACCTTCATCCACAAGACAA

>4\_DWV-A-F\_Ants-13Oct2022\_D03\_2022-10-13\_3.ab1 (120 bases) [99.16%; MF409157.1]

CGTGGTGTAGTAAGCGTCAGTGAACATATTGCTGACTTTGATCTTGTGTGGACTGATAATTTGCGTGTGTTAAGCGCGTATGTCATGAACGTTTCATCTTCAACTCGGCTTTCTACGGAA

>4\_DWV-A-R\_Ants-13Oct2022\_D04\_2022-10-13\_3.ab1 (111 bases) [99%; KY451706.1]

GTCCACACAAGATCAAAGTCAGCAATTTGTTTCATGACGCTTACTACACCACGTAGCTATATATTTCTTCTGTTTTCCAGTTATATAACCTTCATCCACAAGACAACGGAAT

>6\_DWV-A-R\_Ants-13Oct2022\_F04\_2022-10-13\_3.ab1 (116 bases) [98.84%; OP889268.1]

TATCAGTCACTACTACACGTATCATCGATCAGCACATATGTTTCATGACGCTTACTACACCACGTAGCTATATATTTCTTCTGTTTTCCAGTTATATAACCTTCATCCACAAGACA

(+) control - honeybee

>7\_DWV-A-R\_DWV-3OCT22\_G05\_2022-10-04\_3.ab1 (120 bases) [100%; OP889268.1]

ACACACGCAAATTATCAGTCCACACAAGATCAAAGTCAGCAATATGTTTCATGACGCTTACTACACCACGTAGCTATATATTTCTTCTGTTTTCCAGTTATATAACCTTCATCCACAAGAC

>7\_DWV-A-F\_DWV-3OCT22\_G02\_2022-10-04\_3.ab1 (135 bases) [98.41%; MF409157.1]

AAACATTATAGCTACGTGGTGTAGTAAGCGTCATGAACATATTGCTGACTTTGATCTTGTGTGGACTGATAATTTGCGTGTGTTAAGCGCGTATGCGCATGAACGTTTCATCTTCAACTCGGCTTTCTACGGAATC

DWV-A Contigs

>Contig1 11 reads, 180 bases [98.82%; MF409144.1]

CGYTTTGCTTGTGGATGAAGGTTATATAACTGGAACAGAGAATAATATAGCTACGTGGTGTAGTAAGCGTCATGAACATATTGCTGACTTTGATCTTGTGTGGACTGATAATTTGCGTGTGTTAAGCGCGTAT

GCGCATGAACGTTTCATCTTCAACTCGGCTTTCTACGGAAGGAG

>Contig2 6 reads, 108 bases [97.03%; KX373899.2]

AGTCTATGGTGGTCTTCATCATCGGGATTTCTTGAGGCTTGAGGCTCTGTATATTGACATTCACCTGATGAACGCCGAACCTGTTTCATGCGCTTCAATCTCCGARMAA

>Queen\_B8\_DWV-11-30-2022\_A04\_2022-11-30\_2.ab1; from Contig 2 (286 bases) [100%; OL803824]

GCATACCTAAATTTGATATGATGGAATCTTTCAACATCTTAGGACTACATTCAGCAATAGGAATATCATTCTCACAATGCTTGCATCCTCGCTTCTTCTTCACTCGCTTACATTCATCAAAACATTTCTACGCCGATAAATAGC  
TTCCATAGCAATACGATCAAACCTCGGAAAGGCTTATTCGTATTGTATGAAATATTTCCGGGTTATATCGCATTTTCTTACCTTCTAAATCAGCTTTAGGAGGAGAAAGCACGATAGGGGAATGGACCTGGAAAA

>Queen\_F6\_DWV-11-30-2022\_A03\_2022-11-30\_2.ab1; from Contig 2 (334 bases) [99%; MH267695.1]

ATCCTCTATAGGCCGAAGAAAGTCATATACAATACGAATAATCCTTTCCGAGGTTTGATCGTATTGCTATGGAAGCTATTTATCGGCGTAGAAATGTTTTGATTGAATGTAAGCGAGTGAAGAGAAGAAGCGAGGATGCAAG  
CATTGTGAGAATGATATTCCTATTGCTGAATGTAGTCCTAAGATGTTGAAAGATTTCATCATATCAAATTTAGGTATGCACATGACGTATGTAATCCGAGACTACATGGTCTGAATGGATGACGTATAATGAATTTCTTGAATG  
GATAACTCCTGTGTATATGGCTAACCGTCGTAAGGCGAATGAAG

>NW-F\_DWV-A-R\_DWV-11-30-2022\_E02\_2022-11-30\_2.ab1; from Contig 1 (118 bases) [100%; OP889268.1]

CGAACATTATCAGTCCACACAAGATCAAAGTCAGCAATATGTTTCATGACGCTTACTACACCACGTAGCTATATATTTCTTCTGTTTTCCAGTTATATAACCTTCATCCACAAGACAAA

>NW-F\_DWV-A-F\_DWV-11-30-2022\_E02\_2022-11-30\_2.ab1; from Contig 1 (147 bases) [88%; MF409157.1]

GGCAGCCGTCAGCCCTATATATGTCTACGA

**Supplementary Materials: Data Set S1C.** Results of Sanger sequencing of multiple samples from pooled workers, DW and NW male alates (single and pooled), and pupae of *S. invicta* showing positive detection for DWV using subvariant-A-specific primers.

C

>1\_DWV-A-F\_Worker Ants-20Oct2022\_A01\_2022-10-20\_1.ab1 (110 bases) [97.17%; MF409157.1]

GCGTCATGAAACATATTGCTGACTTTGATCTTGTGTGGACTGATAATTTGCGTGTGTTAAGCGCGTATGCGCATGAACGTTTCATCTTCAACTCGGCTTTCTACGGAAGCG

>1\_DWV-A-R\_Worker Ants-20Oct2022\_A03\_2022-10-20\_1.ab1 (101 bases) [100%; OP889268.1]

CACAAGATCAAAGTCAGCAATATGTTTCATGACGCTTACTACACCACGTAGCTATATATTTCTTCTGTTTTCCAGTTATATAACCTTCATCCACAAGACAAA

>2\_DWV-A-F\_Worker Ants-20Oct2022\_B01\_2022-10-20\_1.ab1 (111 bases) [98.17%; MF409157.1]

GTAAGCGTCATGAACATATTGCTGACTTTGATCTTGTGTGGACTGATAATTTGCGTGTGTTAAGCGCGTATGCGCATGAACGTTTCATCTTCAACTCGGCTTTCTACGGAAG

>2\_DWV-A-R\_Worker Ants-20Oct2022\_B03\_2022-10-20\_1.ab1 (120 bases) [99.15%; OP889268.1]

CACGCCAATTATCAGTCCACACAAGATCAAAGTCAGCAATATGTTTCATGACGCTTACTACACCACGTAGCTATATATTTCTTCTGTTTTCCAGTTATATAACCTTCATCCACAAGACAAA

>3\_DWV-A-F\_Worker Ants-20Oct2022\_C01\_2022-10-20\_1.ab1 (110 bases) [98.17%; MF409157.1]

GTAAGCGTCATGAACATATTGCTGACTTTGATCTTGTGTGGACTGATAATTTGCGTGTGTTAAGCGCGTATGCGCATGAACGTTTCATCTTCAACTCGGCTTTCTACGGAA

>3\_DWV-A-R\_Worker Ants-20Oct2022\_C03\_2022-10-20\_1.ab1 (108 bases) [100%; OP889268.1]

GTCCACACAAGATCAAAGTCAGCAATATGTTTCATGACGCTTACTACACCACGTAGCTATATATTTCTTCTGTTTTCCAGTTATATAACCTTCATCCACAAGACAAAAC

>4\_DWV-A-R\_Worker Ants-20Oct2022\_D03\_2022-10-20\_1.ab1 (112 bases) [100%; OP889268.1]

ATTATCAGTCCACACAAGATCAAAGTCAGCAATATGTTTCATGACGCTTACTACACCACGTAGCTATATATTTCTTCTGTTTTCCAGTTATATAACCTTCATCCACAAGACAA

>5\_DWV-A-F\_Pupae-20Oct2022\_E01\_2022-10-20\_1.ab1 (107 bases) [99.23%; MF409157.1]

GTCGATAGAACATATTGCTGACTTTGATCTTGTGTGGACTGATAATTTGCGTGTGTTAAGCGCGTATGCGCCATGAACGTTTCATCTTCAACTCGGCTTTCTACGGAA

>6\_DWV-A-F\_Worker Ants-20Oct2022\_F01\_2022-10-20\_1.ab1 (122 bases) [97.39%; MF409157.1]

CTACGGAGTAGTAAGCGTCATGAACATATTGCTGACTTTGATCTTGTGTGGACTGATAATTTGCGTGTGTTAAGCGCGTATGCGCATGAACGTTTCATCTTCAACTCGGCTTTCTACGGAAAA

>6\_DWV-A-R\_Worker Ants-20Oct2022\_F03\_2022-10-20\_1.ab1 (106 bases) [98.06%; OP889268.1]

TCCACAACAGGATCAAAGTCAGCAATATGTTTCATGACGCTTACTACACCACGTAGCTATATATTTCTTCTGTTTTCCAGTTATATAACCTTCATCCACAAGACAGA

>7\_DWV-A-F\_Worker Ants-20Oct2022\_G01\_2022-10-20\_1.ab1 (117 bases) [97.35%; MF409157.1]

GGATGTAGTAGCGTCATGAACATATTGCTGACTTTGATCTTGTGTGGACTGATAATTTGCGTGTGTTAAGCGCGTATGCGCATGAACGTTTCATCTTCAACTCGGCTTTCTACGGAAA

>7\_DWV-A-R\_Worker Ants-20Oct2022\_G03\_2022-10-20\_1.ab1 (100 bases) [98.92%; OP889268.1]

AAAAATCAAAGTCAGCAATATGTTTCATGACGCTTACTACACCACGTAGCTATATATTTCTTCTGTTTTCCAGTTATATAACCTTCATCCACAAGACAAA

>8\_DWV-A-F\_DW male Alates pooled-20Oct2022\_H01\_2022-10-20\_1.ab1 (108 bases) [98.11%; MF409157.1]

TAGCGTCATGAACATATTGCTGACTTTGATCTTGTGTGGACTGATAATTTGCGTGTGTTAAGCGCGTATGCGCATGAACGTTTCATCTTCAACTCGGCTTTCTACGGAA

>9\_DWV-A-F\_NW male Alates pooled-20Oct2022\_A02\_2022-10-20\_1.ab1 (116 bases) [95.45%; MF409157.1]

TATGCGTCATGCAACATATTGCTGCACTTTGATCTTGTGTGGACTGATAATTTGCGTGTGTTAAGCGCGTATGCGCATGAACGTTTCATCTTCAACTCGGCTTTCTACGGAAACGGAA

>10\_DWV-A-F\_DW male Alate-20Oct2022\_B02\_2022-10-20\_1.ab1 (112 bases) [97.30%; MF409157.1]

AGTAAGCGTCATCGAACATATTGCTGACTTTGATCTTGTGTGGACTGATAATTTGCGTGTGTTAAGCGCGTATGCGCATGAACGTTTCATCTTCAACTCGGCTTTCTACGGAA  
>10\_DWV-A-R\_DW male Alate-20Oct2022\_B04\_2022-10-20\_1.ab1 (112 bases) [98.18%; OP889268.1]  
TTATCAGCTCCACACAGATCAAAGTCAGCAATATGTTTCATGACGCTTACTACACCAGTAGCTATATATTTCTTCTGTTTTCCAGTTATATAACCTTCATCCACAAGACAA  
>11\_DWV-A-F\_DW male Alate-20Oct2022\_C02\_2022-10-20\_1.ab1 (102 bases) [98.96%; MF409157.1]  
CGAGACATATTGCTGACTTTGATCTTGTGTGGACTGATAATTTGCGTGTGTTAAGCGCGTATGCGCATGAACGTTTCATCTTCAACTCGGCTTTCTACGGAAA  
>12\_DWV-A-F\_DW male Alate-20Oct2022\_D02\_2022-10-20\_1.ab1 (104 bases) [98.94%; MF409157.1]  
CTTCGAGAATATTGCTGACTTTGATCTTGTGTGGACTGATAATTTGCGTGTGTTAAGCGCGTATGCGCATGAACGTTTCATCTTCAACTCGGCTTTCTACGGAAAG  
>14\_DWV-A-F\_DW male Alates pooled-20Oct2022\_F02\_2022-10-20\_1.ab1 (111 bases) [98.17%; MF409157.1]  
GTAAGCGTCATGAACATATTGCTGACTTTGATCTTGTGTGGACTGATAATTTGCGTGTGTTAAGCGCGTATGCGCATGAACGTTTCATCTTCAACTCGGCTTTCTACGGAAA

>DWV-A Contig\_1 (182 bases) [98.82%; MF409144.1]

GWaTTTGTCTTGTGGATGAAGGTTATATACTGGAAACAGAAATATATAGCTACGTGGTGTAGTAAGCGTCATGAACATATTGCTGACTTTGATCTTGTGTGGACTGATAATTTGCGTGTGTTAAGCGCGTATGCGCATG  
AACGTTTCATCTTCAACTCGGCTTTCTACGGAARVGGAA

**Supplementary Materials: Data Set S1D-F.** Results of Sanger sequencing of multiple samples from pooled DW and NW male and female alates and pupae of *S. invicta* showing positive detection for DWV using subvariant-A-specific primers.

## D

>1-DWV-A-F\_DWV-pooled 1Nov22\_A02\_2022-11-01\_2.ab1 (114 bases) (male) [98.23%; MF409157.1]  
TGTAAGCGTCATGAACATATTGCTGACTTTGATCTTGTGTGGACTGATAATTTGCGTGTGTTAAGCGCGTATGCGCATGAACGTTTCATCTTCAACTCGGCTTTCTACGGAA  
>1-DWV-A-R\_DWV-pooled 1Nov22\_A04\_2022-11-01\_2.ab1 (107 bases) (male) [99.06%; OP889268.1]  
TCCACACAAGATCAAAGTCAGCAATATGTTTCATGACGCTTACTACACCAGTAGCTATATATTTCTTCTGTTTTCCAGTTATATAACCTTCATCCACAAGACATTCG  
>2-DWV-A-F\_DWV-pooled 1Nov22\_B02\_2022-11-01\_2.ab1 (119 bases) (male) [97.41%; MF409157.1]  
CGATGGTGTAGTAGCGTCATGAACATATTGCTGACTTTGATCTTGTGTGGACTGATAATTTGCGTGTGTTAAGCGCGTATGCGCATGAACGTTTCATCTTCAACTCGGCTTTCTACGGAA  
>3-DWV-A-F\_DWV-pooled 1Nov22\_C02\_2022-11-01\_2.ab1 (117 bases) (male) [97.37%; MF409157.1]  
TGCGTGTAGTAGCGTCATGAACATATTGCTGACTTTGATCTTGTGTGGACTGATAATTTGCGTGTGTTAAGCGCGTATGCGCATGAACGTTTCATCTTCAACTCGGCTTTCTACGGAA  
>3-DWV-A-F\_DWV-pooled 1Nov22\_C01\_2022-11-01\_2.ab1 (110 bases) (male) [97.27%; MF409157.1]  
AGTAGCGTCATGAACATATTGCTGACTTTGATCTTGTGTGGACTGATAATTTGCGTGTGTTAAGCGCGTATGCGCATGAACGTTTCATCTTCAACTCGGCTTTCTACGGAA  
>3-DWV-A-R\_DWV-pooled 1Nov22\_C04\_2022-11-01\_2.ab1 (112 bases) (male) [100%; OP889268.1]  
AATTATCAGTCCACACAAGATCAAAGTCAGCAATATGTTTCATGACGCTTACTACACCAGTAGCTATATATTTCTTCTGTTTTCCAGTTATATAACCTTCATCCACAAGACAA  
>3-DWV-A-R\_DWV-pooled 1Nov22\_C03\_2022-11-01\_2.ab1 (111 bases) (male) [100%; OP889268.1]  
ATTATCAGTCCACACAAGATCAAAGTCAGCAATATGTTTCATGACGCTTACTACACCAGTAGCTATATATTTCTTCTGTTTTCCAGTTATATAACCTTCATCCACAAGACAA  
>4-DWV-A-F\_DWV-pooled 1Nov22\_D02\_2022-11-01\_2.ab1 (125 bases) (male) [97.41%; MF409157.1]  
ATGGTGTAGTAGGCGTCATGAACATATTGCTGACTTTGATCTTGTGTGGACTGATAATTTGCGTGTGTTAAGCGCGTATGCGCATGAACGTTTCATCTTCAACTCGGCTTTCTACGGAAATAACTG  
>4-DWV-A-R\_DWV-pooled 1Nov22\_D04\_2022-11-01\_2.ab1 (126 bases) (male) [100%; OP889268.1]  
CACGCAAAATTATCAGTCCACACAAGATCAAAGTCAGCAATATGTTTCATGACGCTTACTACACCAGTAGCTATATATTTCTTCTGTTTTCCAGTTATATAACCTTCATCCACAAGACAAGGGTGT  
>4-DWV-A-R\_DWV-pooled 1Nov22\_D03\_2022-11-01\_2.ab1 (110 bases) (male) [100%; OP889268.1]  
TATCAGTCCACACAAGATCAAAGTCAGCAATATGTTTCATGACGCTTACTACACCAGTAGCTATATATTTCTTCTGTTTTCCAGTTATATAACCTTCATCCACAAGACAA  
>7-DWV-A-F\_DWV-pooled 1Nov22\_G02\_2022-11-01\_2.ab1 (113 bases) (male) [96.26%; MF409157.1]  
CGTCGATGTAGTAGCGTCATGAACATATTGCTGACTTTGATCTTGTGTGGACTGATAATTTGCGTGTGTTAAGCGCGTATGCGCATGAACGTTTCATCTTCAACTCGGCTTT  
>7-DWV-A-R\_DWV-pooled 1Nov22\_G04\_2022-11-01\_2.ab1 (109 bases) (female) [99.04%; OP889268.1]  
AGTCCACACAGATCAAAGTCAGCAATATGTTTCATGACGCTTACTACACCAGTAGCTATATATTTCTTCTGTTTTCCAGTTATATAACCTTCATCCACAAGACAAGCCA

>8-DWV-A-R\_DWV-pooled 1Nov22\_H04\_2022-11-01\_2.ab1 (102 bases) (female) [100%; OP889268.1]  
CAAGATCAAAGTCAGCAATATGTTTCATGACGCTTACTACACCACGTAGCTATATATTTCTTCTGTTTTCCAGTTATATAACCTTCATCCACAAGACAGGAGG

>Contig\_1 (186 bases) [98.82%; MF409144.1]  
CAGTATTTCCGTAGAAAGCCGAGTTGAAGATGAACGTTTCATGCGCATACGCGCTTAACACACGCAAATTATCAGTCCACACAAGATCAAAGTCAGCAATATGTTTCATGACGCTTACTACACCACGTAGCTATATATTTCTTCTGT  
TTTTCCAGTTATATAACCTTCATCCACAAGACAAGSSWGT

## E

Pupa\_DWV-A-F\_DWV\_male pupa-11-29-2022 (115 bases) [98.26%; MF409157.1]  
GGTGTAGTAAGCGTCATGAACATATTGCTGACTTTGATCTTGTGTGGACTGATAATTGCGTGTGTTAAGCGCGTATGCGCATGAACGTTTCATCTTCAACTCGGCTTTCTACGGA  
Pupa\_DWV-A-R\_DWV\_male pupa-11-29-2022 (115 bases) [99.13%; OP889268.1]  
CGCAATTATCAGTCCACACAAGATCAAAGTCAGCAATATGTTTCATGACGCTTACTACACCACGTAGCTATATATTTCTTCTGTTTTCCAGTTATATAACCTTCATCCACAAGACA

>Contig\_1\_DW\_male pupa-11-29-2022 (179 bases) [98.22%; MF409144.1]  
AAGCCCGTTGTCTTGTGGATGAAGGTTATATACTGGAAACAGAAATATATAGCTACGTGGTGTAGTAAGCGTCATGAACATATTGCTGACTTTGATCTTGTGTGGACTGATAATTtGCGTGTGTtAAGCGCGTAtGCGCM  
TGAACGTTTCATCT  
TCAACTCGGCTTTCTACGGAA

## F

>13\_DWV-A-R\_DWV-27Oct2022\_E04\_2022-10-27\_1.seq (157 bases) (female) [98.26%; OP889268.1]  
ACCGGGGCTCCAACACTTTTTTGTCTGCAAAACAATTTATCAGTCCACACAAGATCAAAGTCAGCAATATGTTTCATGACGCTTACTACACCACGTAGCTATATATTTCTTCTGTTTTCCAGTTATATAACCTTCATCCACAAGACA  
AACCCGTCG

**Supplementary Materials: Data Set S1G.** Results of Sanger sequencing of multiple samples from DW male and female alates, and workers, of *S. invicta* showing positive detection for the replicative form of DWV using primers specific for the RNA-dependent RNA polymerase (RD-RP) gene. Also, there are samples that were diluted two-times.

## G

>15-Beehead\_DWV-B23\_DWV-rep-17Feb23\_G04\_2023-02-21\_2.ab1 (424 bases) [100%; MG831204.1]  
GGGAATACAATTTCAAATGTTTGTAAATTAGGTTAGCTTGTTAGGTATTACTGATTGCTTTGTCCGAGTTCTCTCAAATGTTGTTCTGTCTGTTATGGCGACGATCTTATCATGAATGTTAGCGATAACATGATTGATAAGT  
TTAACGCCGT  
GACGATAGGAAAAATCTTTTCAATATAAGATGGAATTTACGGATCAGGATAAATCAGGAAATACTGTAAAGTGGCGGACGTTACAGACTGCTACTTTCTTAAACATGGGTTCTTAAACATCCAACCTAGACCTGTGTTTCTA  
GCTAACCTGGACA  
AGGTCTCGGTAGAAGGAACGACGAATTGGACTCATGCTCGAGGATTGGGTCGTCGACAGCAACCATAGAAAATGCTAAACAAGCGTTAGAGTTAGCATTGTTGGTGGA  
>15-Beehead\_DWV-B23\_2XD\_DWV-rep-17Feb23\_G08\_2023-02-21\_2.ab1 (two-times dilution) (401 bases) [99.74%; MH069505.1]  
CACAAATCCTAGAGCATGAGTCCAATTCGTCGTTCTTCTACCGAGACCTTGCCAGGTTAGCTAGAAACACAGGTCTAGTTGGATGTTTTAAGAACCCATGTTTTAAGAAAGTAGCAGTCTGTAACGTCCGCCACTTTACAGTATT  
TCCTGATTATC  
CTGATCCGTAAATTCATCTTATATTGTGAAAAGAATTTCTATCGTCACGGCGTTAACTTATCAATCATGTTATCGCTAACATTCATGATAAGATCATCGCCATAACAGACAAGAACAACATTTTGAGAGAACTCGGACAAAG  
GCAATCAGTAA  
TACCTAACCAAGCTAACCTAATTAACAAACAATTTGAAATTGTATTCAATATGTCGTTATTGGAGAACCTGATGGACCACTTA  
>3-DW-F-DWV-B23\_DWV-rep-17Feb23\_C03\_2023-02-21\_1.ab1 (385 bases) (female) [97.80%; MG831204.1]



AGGGTGTTCTTCGTCTCCTTCGTCCGAATTCTCTCAAATGGTTGGCTTGCTGTTATGGCGACGATCTTATCATGAATGTTAGCGATAACATGATTGATAAGTTTAACGCCGTGACGATGGAAAATTCTTTTACAATATAAGATG  
GAATTTACGGA  
TCAGGATAAATCAGGAAATACTGTAAAGTGGCGGACGTTACAGACTGCTACTTTCTTAAACATGGGTTCTTAAACATCCAAGTACGCTGTGTTCTAGCTAACCTGGACAAGGTCTCGGTAGAAGGAACGACGAATTGGACT  
CATGCTCGAGGAT  
TGGGTCGTCGTACAGCAACCATAGAAAATGCTAAACAAGCGTTAGAGTTAGATTTTGGGTGGACACCGT  
**>3-DW-F-DWV-B23\_2XD\_DWV-rep-17Feb23\_C07\_2023-02-21\_1.ab1 (two-times dilution) (370 bases) (female) [97.22%; MG831204.1]**  
TACCTTCTCCTAGACCTTGTTGAGTGAGCTGGAAACACAGGTTAAGTTGGATGTTTTAAGAACCCATGTTTTAAGAAAGTAGCAGTCTGTAACTCCGCCACTTTACAGTATTTCTGATTTATCCTGATCCGTAAATTCATCTTAT  
ATTGTGAAAA  
GAATTTTCCTATCGTCACGGCGTTAACTTATCAATCATGTTATCACTAACATTCATGATAAGATCGTCGCCATAACAGACAAGAACAACATTTTGAGAGAACTCGGACAAAGGCAAATCAGTAATACCTAACCAAGCTAACCTAA  
TTAACAAACAAT  
TTGAAATTGTATTCAATATGTCCGTTATTGGAGAACCTGATGGACCACGGGCGG  
**>DW-M\_DWV-B23-14Feb2023-1\_A02\_2023-02-14\_2.ab1 (275 bases) (male) [100%; MN902115.1]**  
AGCAGTCTGTAACTGCCCACTTTACAGTATTTCTGATTTATCCTGATCCGTAAATCCATCTTATATTGTGAAAAGAATTTCTATCGTCACGGCGTTAACTTATCAATCATGTTATCACTAACATTCATGATAAGATCGTCG  
CCATAACAGA  
CAAGAACAACATTTTGAGAGAACTCGGACAAAGGCAAATCAGTAATACCTAACCAAGCTAACCTAATTAACAAACAATTTGAAATTGTATTCAATATGTCCGTTATTGGAGAACCTG  
**>DW-M-Col14\_DWV-B23-14Feb2023-1\_E02\_2023-02-14\_1.ab1 (194 bases) (male) [99.48%; KP734594.1]**  
TCCTCGAGCATGAGTCCAATTCGTCGTTCTTCTACCGAGACCTTGTCAGGTTAGCTAGAAACACAGGTCTAGTTGGATGTTTTAAGAACCCATGTTTTAAGAAAGTAGCAGTCTGTAACTTCGCCACTTTACAGTGTTCCTGA  
TTTATCCTGAT  
CCGTAAATTCATCTTATATTGTGAAAAGAATTTTC  
**>12-Workers-Col14\_DWV-B23\_DWV-rep-17Feb23\_D04\_2023-02-21\_1.ab1 (347 bases) [99.42%; MT068461.1]**  
TCTCAAAGGTTGTTCTTGCTGTTATGGCGACGATCTTATCATGAATGTTAGTGATAACATGATTGATAAGTTTAACGCCGTGACGATAGGAAAATTCTTTTACAATATAAGATGGAATTTACGGATCAGGATAAATCAGGAAA  
TACTGTAAAGTG  
GCGGACGTTACAGACTGCTACTTTCTTAAACATGGGTTCTTAAACATCCAAGTACGCTGTGTTCTAGCTAACCTGGACAAGGTCTCGGTAGAAGGAACGACGAATTGGACTCATGCTCGAGGATTGGGTCGTCGTACAGCA  
ACCATAGAAAATG  
CTAAACAAGCGTTAGAGTTAGCATTGGGTG

**Supplementary Materials: Data Set S1H.** Results of Sanger sequencing of multiple samples from DW male and female alates, and workers, of *S. invicta* showing positive detection for the replicative form of DWV using a tag-primer that was incorporated into a fragment of the RNA-dependent RNA polymerase (RD-RP) gene during the reverse transcriptase step. Also, there are samples diluted two-times.

## H

>15-Beehead\_Tag\_DWV-rep-17Feb23\_G02\_2023-02-21\_2.ab1 (411 bases) [99.26%; MW222481.1]

TGTGTGTTAATTAGGTTAGCTTGGTTAGGTATTACTGATTTGCCTTTGTCGAGTTCTCTCAAAATGTTGTTCTTGTCTGTTATGGCGATGATCTTATCATGAATGTTAGCGATAACATGATTGATAAGTTTAACGCCGTGACGATA  
GGAAAAATCTT  
TTCACAAATATAAGATGGAATTTACGGATCAGGATAAATCAGGAAATACTGTAAAGTGGCGGACGTTACAGACTGCTACTTTCTTAAACATGGGTTCTTAAACATCCAAGTACCTGTGTTTCTAGCTAACCTGGACAAGGTC  
TCGGTAGAAGGAA  
CGACGAATTGGACTCGCTCGAGGATTGGGTCGTCGTACAGCAACCATAGAAAAATGCTAAACAAGCGTTAGAGTTAGCATTTTGGGGTGGAGAT

>15-Beehead\_Tag\_2XD\_DWV-rep-17Feb23\_G06\_2023-02-21\_2.ab1 (two-times dilution) (381 bases) [97.88%; MG831204.1]

AGCTTTGGTTAGGTATTACCGATTGCTTTGACAGAGTTCTCTAATGTTGTTCTGCTGTTATGGCGACGATCTTATCATGAATGTTAGTGATAACATGATTGATAAGTTCAACGCCGTGACGATAGGAAAATCTTTTACAA  
ATATAAGATGG  
AATTACGGATCAGGATAAATCAGGAAATACTGTAAAGTGGCGGACGTTACAGACTGCTACTTTCTTAAACATGGGTTCTTAAACATCCAAGTACCTGTGTTTCTAGCTAACCTGGACAAGGTCCTCGGTAGAAGGAACGAC  
GAATTGGACTCAT  
GCTCGAGGATTGGGTCGTCGTACAGCAACCATAGAAAAATGCTAAACAAGCGTTAGAGTTAGTTTT

>NW-M-B1\_Tag\_DWV-rep-16Feb23\_F01\_2023-02-16\_3.ab1 (414 bases) (male) [98.77%; MG831204.1]

TTGTTACATTTCAATTGTTTGAATTAGGTTAGCTTGGTTAGGTATTACTGATTTGCCTTTGTCGAGTTCTCTCAAAATGTTGTTCTTGTCTGTTATGGCGACGATCTTATCATGAATGTTAGTGATAACATGATTGATAAGTTCAA  
CGCCGTGAC  
GATAGGAAAATCTTTTACAAATATAAGATGGAATTTACGGATCAGGATAAATCAGGAAATACTGTAAAGTGGCGGACGTTACAGACTGCTACTTTCTTAAACATGGGTTCTTAAACATCCAAGTACCTGTGTTTCTAGCTA  
ACCTGGACAAGG  
TCTCGGTAGAAGGAACGACGAATTGGACTCATGCTCGAGGATTGGGTCGTCGTACAGCAATCCATAGAAAAATGCTAAACAAGCGTTAGAGTCTTTTTT

>14-NW-M-1B\_Tag\_2XD\_DWV-rep-17Feb23\_F06\_2023-02-21\_2.ab1 (two-times dilution) (373 bases) (male) [98.66%; MG831204.1]

ATGGTTGGGTATTACTGATTTGCCTTTGTCAGAGTTCTCTTAAATGTTGTTCTTGTCTGTTATGGCGACGATCTTATCATGAATGTTAGTGATAACATGATTGATAAGTTCAACGCCGTGACGATAGGAAAATCTTTTACAAATA  
TAAGATGGAAT  
TTACGGATCAGGATAAATCAGGAAATACTGTAAAGTGGCGGACGTTACAGACTGCTACTTTCTTAAACATGGGTTCTTAAACATCCAAGTACCTGTGTTTCTAGCTAACCTGGACAAGGTCCTCGGTAGAAGGAACGACGA  
ATTGGACTCATGCT  
CGAGGATTGGGTCGTCGTACAGCAACCATAGAAAAATGCTAAACAAGCGTTAGAGTTA

>4-DW-F-Tag\_DWV-rep-17Feb23\_D01\_2023-02-21\_1.ab1 (344 bases) (female) [98.55%; MT068461.1]

TCTCTCAAAATGTTGTTCTTGTCTGTTATGGCGACCATCTTATCATGAATGTTAGTGATAACATGATTGATAAGTTCAACGCCGTGACGATGGGAAAATCTTTTACAAATATAAGATGGAATTTACGGATCAGGATAAATCAGGA  
AATACTGTAAAG  
TGGCGGACGTTACAGACTGCTACTTTCTTAAACATGGGTTCTTAAACATCCAAGTACCTGTGTTTCTAGCTAACCTGGACAAGGTCCTCGGTAGAAGGAACGACGAATTGGACTCATGCTCGAGGATTGGGTCGTCGTACAG  
CAACCATAGAAAA  
TGCTAAACAAGCGTTAGAGTTAGATTTT

>4-DW-F-Tag\_2XD\_DWV-rep-17Feb23\_D05\_2023-02-21\_1.ab1 (two-time dilution) (377 bases) (female) [97.05%; MG831204.1]

AGACTGATTTGAGCTTGAGTGTTCTCTCGGATGGTGTTCTTGTCTGTTATGGCGACGATCTTATCATGAATGTTAGCGATAACATGATTGATAAGTTTAAACGCCGTGACGATAGGAAAATCTTTTACAAATATAAGATGGAAT  
TTACGGATCAGG  
ATAAATCAGGAAATACTGTAAAGTGGCGGACGTTACAGACTGCTACTTTCTTAAACATGGGTTCTTAAACATCCAAGTACCTGTGTTTCTAGCTAACCTGGACAAGGTCCTCGGTAGAAGGAACGACGAATTGGACTCATGC  
TCGAGGATTGGGT  
CGTCGTACAGCAACCATAGAAAAATGCTAAACAAGCGTTAGAGTTAGCATTTTGGGTGGAGA

>9-DW-M-Col8\_Tag\_DWV-rep-17Feb23\_A06\_2023-02-21\_1.ab1 (413 bases) (male) [99.51%; MG831204.1]

ATACATTTCAATTGTTTGTAAATTAGGTTAGCTTGGTTAGGTATTACTGATTTGCCTTTGCCGAGTTCTCTCAAATGTTGTTCTTGTCTGTTATGGCGACGATCTTATCATGAATGTTAGCGATAACATGATTGATAAGTTTAACG  
CCGTGACGAT  
AGGAAAATCTTTTACAAATATAAGATGGAATTTACGGATCAGGATAAATCAGGAAATACTGTAAAGTGGCGGACGTTACAGACTGCTACTTTCTTAAACATGGGTTCTTAAACATCCAACCTAGACCTGTGTTCTAGCTAAC  
TGGACAAGGTCT  
CGGTAGAAGGAACGACGAATTGGACTCATGCTCGAGGATTGGGTCGTCGTACAGCAACCATAGAAAATGCTAAACAAGCGTTAGAGTTAGTTTTTTG  
>Workers-Col14\_Tag\_DWV-rep-16Feb23\_D01\_2023-02-16\_3.ab1 (426 bases) [97.58%; MG831204.1]  
GGGGCGTTAGAGTTAGCATTTGGGTGGAGGTTAGGCAAGCTTCTAGGCAGACTGATTTGACCTTGTGAGTGTCTCTCGGATGGTGTCTTGTCTGTTATGGCGACGATCTTATCATGAATGTTAGCGATAACATGATTGATA  
AGTTTAACGCCGT  
GACGATAGGAAAATCTTTTACAAATATAAGATGGAATTTACGGATCAGGATAAATCAGGAAATACTGTAAAGTGGCGGACGTTACAGACTGCTACTTTCTTAAACATGGGTTCTTAAACATCCAACCTAGACCTGTGTTCTA  
GCTAACCTGGACA  
AGGTCTCGGTAGAAGGAACGACGAATTGGACTCATGCTCGAGGATTGGGTCGTCGTACAGCAACCATAGAAAATGCTAAACAAGCGTTAGAGTTAGCATTTGGGTGGAAA

### Supplementary Materials: Data Set S1.

In the above sequencing results, **(A)** Results of Sanger sequencing of samples of *S. invicta* ants from Figure 3., showing positive results for replicative form of DWV: adult workers from colony 8, (pooled,  $n=10$ ), worker pupae, colony 10, (pooled,  $n=5$ ), and deformed wing (DW) male alates, colony 8, (pooled,  $n = 5$ ), showing positive detection for the replicative form of DWV using a tag-primer that was incorporated into a fragment of the RNA-dependent RNA polymerase (RD-RP) gene during the reverse transcriptase step. Samples were ten-times diluted. Additional sequence is from a NW male alates showing the replicative form of the DWV, which is at two-times dilution. **(B)** are results for Sanger sequencing showing the identification of DWV-A to be present in *S. invicta* workers from the following colonies read assignments are as follows: 1.) Col. 2021-worker ants-DWV-A, 2.) Col. B1-worker ants-DWV-A, 3.) Col. 14-worker ants-DWV-A, 4.) Col. 8-pupae-DWV-A, 6.) Col. Greenville-1-worker ants-DWV-A, 7.) Honeybee DWV (+) control. Also have a queen from Greenville-1 positive for DWV, and a NW female re-run positive for DWV. **(C)**, are results for Sanger sequencing showing the identification of DWV-A to be present in *S. invicta* workers and male and female alates with and without wing deformity. Read assignments are as follows: 1.) Col. 2021-worker ants-DWV-A, 2.) Col. B1-worker ants-DWV-A, 3.) Col. 14-worker ants-DWV-A, 4.) Col. 8-worker ants-DWV-A, 5.) Col. 8-pupae-DWV-A, 6.) Col. Greenville-1-worker ants-DWV-A, 7.) Col. Greenville-2 worker ants-DWV-A, 8.) DW-male alates ( $n=5$ )-DWV-A, 9.) NW male alates ( $n=5$ )-DWV-A, 10.) Col. 11-DW-male alate-DWV-A, 11.) Col. NCBL-DW-male alate-DWV-A, 12.) Col. 9-DW-male alate-DWV-A, 14.) DW-male-pooled-DWV-A. **(D)**, are Sanger sequencing detecting DWV-A in additional *S. invicta* male and female alates. Read assignments are as follows: 1-2.) Col. 4-DW male alates-DWV-A ( $n=4$ ), 3-4.) Col. 4-NW male alates-DWV-A ( $n=4$ ), 7-8.) Col. NBCL-7-NW female alates ( $n=4$ ). All samples were pooled. Contig\_1. **(E)**, are results for Sanger sequencing showing the identification of DWV-A to be present in a non-melanized pupa of *S. invicta*. **(F)**, are results for a re-run of a female DW alate due to original sequencing issues experienced on 20-Oct-2022. **(G)**, are results for Sanger sequencing showing the detection of replicative form of DWV in

various castes of *S. invicta*. Target gene is the RD-RP gene. Read assignments are as follows: 1-2.) Western honey bee (+ for DWV) *Apis mellifera*, 3) DW female, 4) DW female alate two-times dilution, 5) DW male alate, 6) Col. 14 DW male alate, 7) Col. 14 workers. (H) are results for tag-only primer used to sequence replicative form of DWV. Read assignments are as follows: 1-2) Western honey bee (+ for DWV) *Apis mellifera*, 3) NW male alate, 4) NW male alate two-times dilution, 5) DW female alate, 6) DW female alate two-times dilution, 7) Col. 8 DW male alate, 8) Col.14 workers.

Details for DNA gel electrophoresis results for *S. invicta*. All samples where there was an observed gel band corresponding to the positive control were sent off for Sanger sequencing. Not all sequencing worked; however, all samples that gave a readable sequence when blasted on NCBI, matched DWV. We used 5 µl of PCR product for DNA gel electrophoresis and, for DWV-A (PCR product size = 168 bp), 10 µl purified for Sanger sequencing. For worker ants (20 to 50 mg, fresh weight) and whole alates (single alate, 5 to 11 mg, fresh weight, or pooled, 30 to 50 mg), fresh weight. For the positive control, we used RNA from a Western honey bee with DW (+ for DWV) *Apis mellifera*. All no template controls (NTC) were negative for bands. For replicative form, all controls: NTC, no primers, and no transcriptase, were negative for bands.

**Videos.** Detailed description of eight videos depicting both deformed wing (DW) and normal wing (NW) male and female alates from numerous *S. invicta* lab and field colonies. The purposes for these videos are to let the reader observe the gross morphological and mobility differences between DW and NW alates. All videos were captured using a Keyence VHX 5000 (Itasca, IL), except for video 4, where a Samsung Galaxy J7 Star mobile phone, was used.

**Video 1** Two deceased and one live DW male alate from *S. invicta* colony NBCL-2, which were collected directly from the *in situ* mound. Ants were collected the day before imaging. At the time of collecting and approximately 90 minutes before video capture, all three alates were alive and possessed some level of mobility but demonstrated an ataxic gait with difficulty righting themselves. All three alates have severe DW phenotype. The runtime for this video is 20 seconds.

**Video 2** Two DW male alates and one NW male alate from Colony 8. The two DW alates are unable to right themselves. The alate, bottom left, died shortly after this video was taken. The alate on the right couldn't walk due to severely deformed legs. This is not a common deformity among the DW males thus far observed. The runtime for this video is 20 seconds.

**Video 3** A DW male alate collected from colony 12 displaying severely deformed wings and an inability to walk. The alate's left back leg is partially paralyzed. Approximately three hours after video capture, the alate died. The runtime for this video is 25 seconds.

**Video 4** Three DW male alates from colony 14. Two DW alates display severe leg deformity and are unable to stand or walk while the third, with slight wing deformity, displays mobility issues with its deformed left hind leg. The runtime for this video is 5 seconds.

**Video 5** A cluster of DW male alates from colony 8 displaying various degrees of wing deformity. The runtime for this video is 20 seconds.

**Video 6** A single DW male alate from colony 1. This alate has severely deformed wings and legs and is unable to right itself. The runtime for this video is 30 seconds.

**Video 7** A single DW male alate from colony 3C. This alate has severely deformed wings and is unable to fully use its hind legs and, at a slower frame speed, one can see this alate is unable to fully extend its right front leg. The runtime for this video is 30 seconds.

**Video 8** Two DW female alates – one with slight wing deformity and the other with severe wing deformity from Colony NBCL-12. Neither female alate shows any ataxia or paralysis. The runtime for this video is 30 seconds.

## Reference

- [34] Chen, J.; Du, Y. Fire ants feed their nestmates with their own venom. *J. Insect Physiol.* 2022, *142*: 104437 doi:10.1016/j.jinsphys.2022.104437
